# Supplementary material
Source: Springer Nature journal article supplement (https://www.springermedizin.de/resource/supplementary/12874_2006_174_MOESM4_ESM.pdf/9433926)

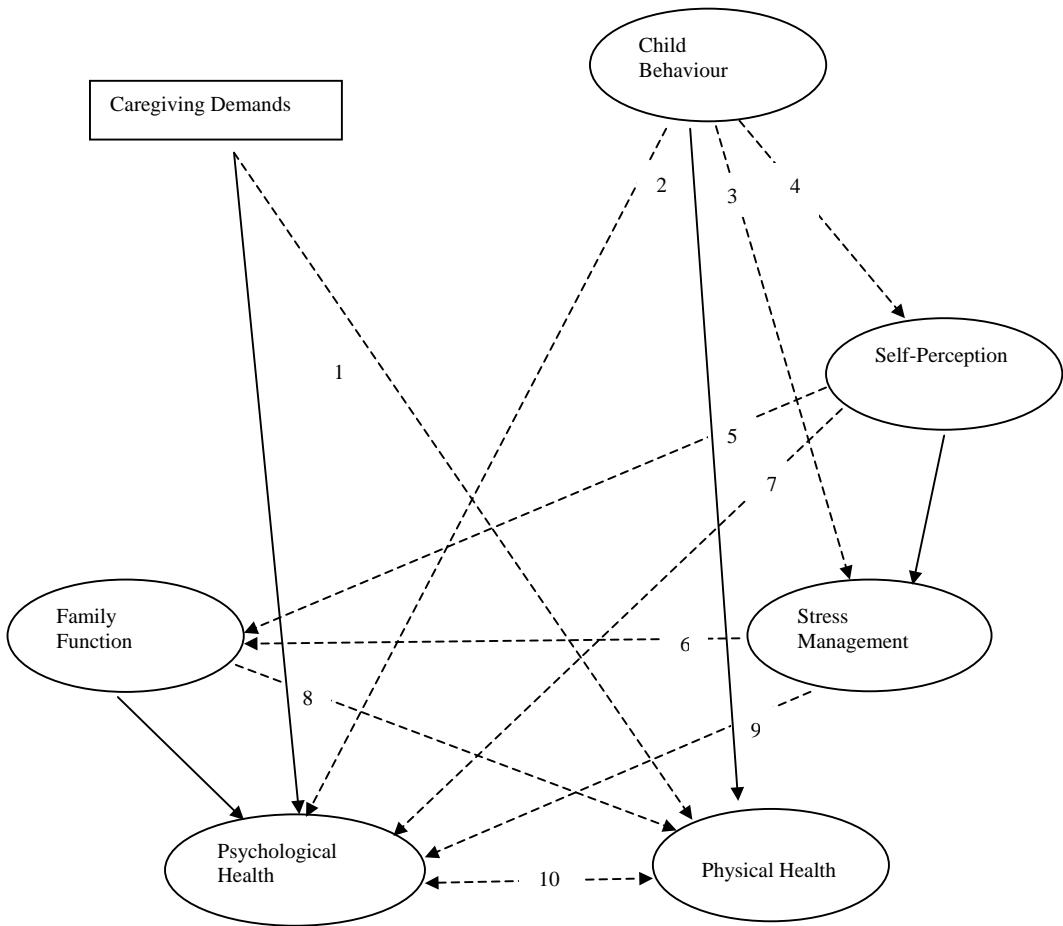

Supplement: MOESM4 [file 9433926]
